# Supplementary material
Source: Elsevier journal article supplement (https://comptes-rendus.academie-sciences.fr/biologies/article/10.1016/j.crvi.2015.03.015/file/attach/mmc2.pdf)
Supplement: mmc2 [file mmc2.pdf]

## Supplementary Figures S6-10

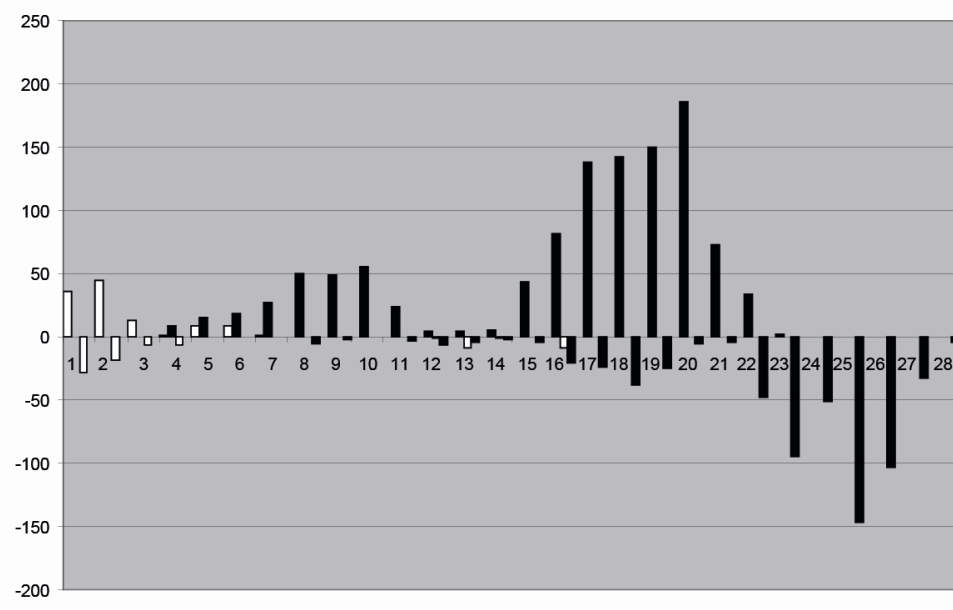

Figures S6. Uncorrected pairwise distances for the Megophryidae. Above the distances for the 16S gene, below the distances for the COI gene; white bars: intraspecific distances, black bars: interspecific distances.

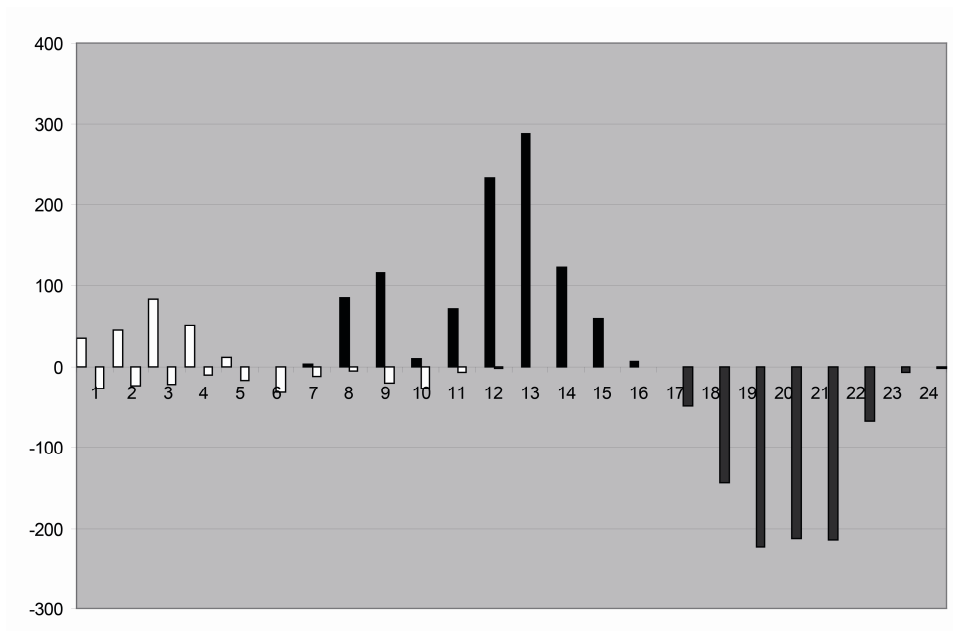

Figures S7. Uncorrected pairwise distances for the Microhylidae. Above the distances for the 16S gene, below the distances for the COI gene; white bars: intraspecific distances, black bars: interspecific distances.

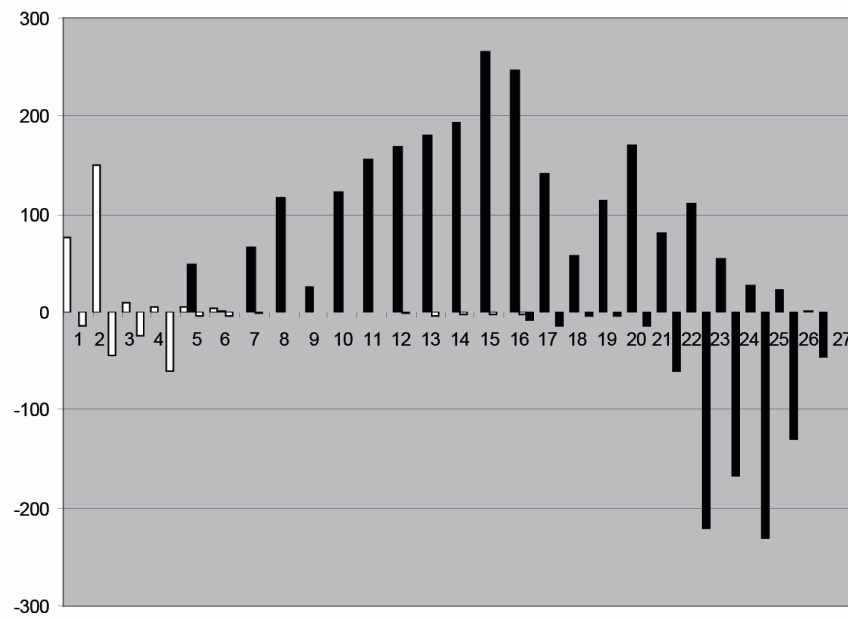

Figures S8. Uncorrected pairwise distances for the Dicroglossidae. Above the distances for the 16S gene, below the distances for the COI gene; white bars: intraspecific distances, black bars: interspecific distances.

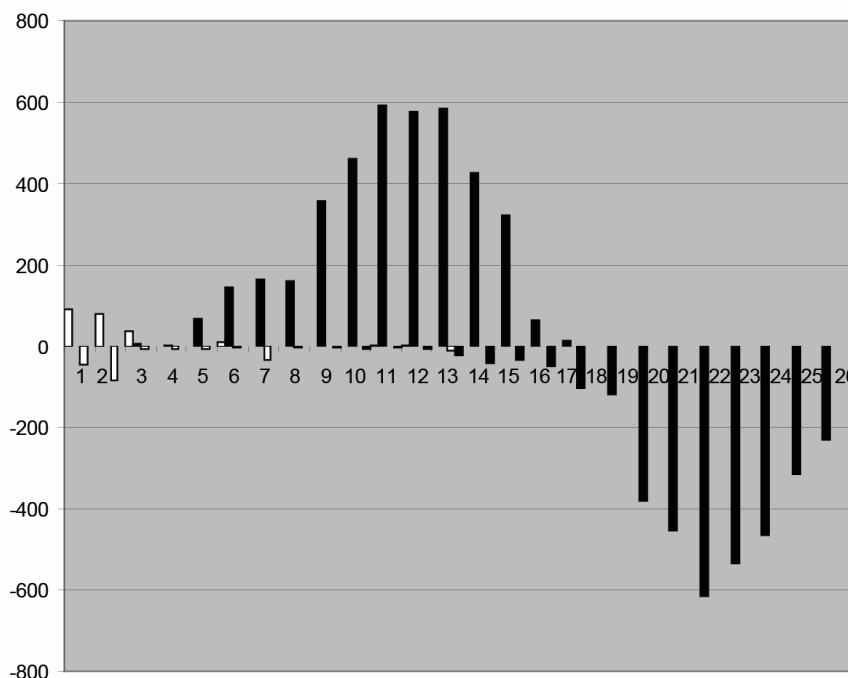

Figures S9. Uncorrected pairwise distances for the Ranidae. Above the distances for the 16S gene, below the distances for the COI gene; white bars: intraspecific distances, black bars: interspecific distances.

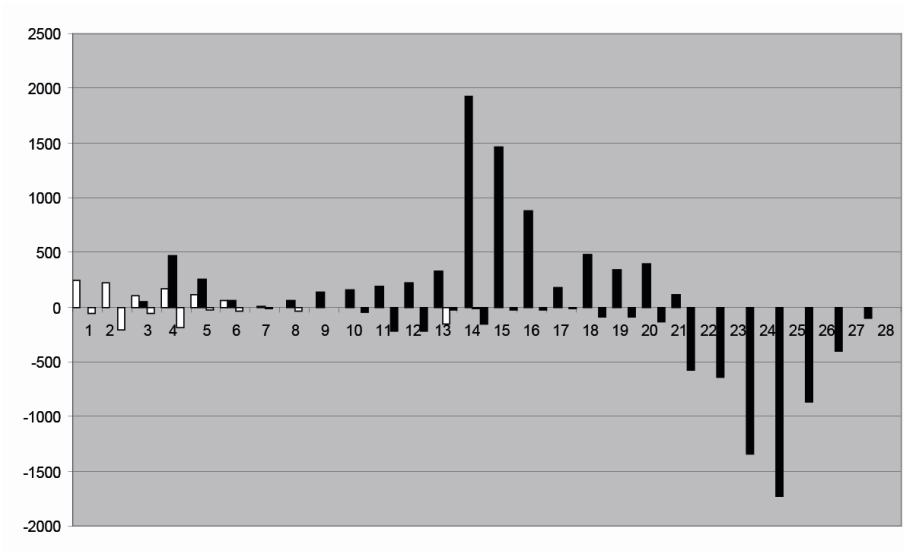

Figures S10. Uncorrected pairwise distances for the Rhacophoridae. Above the distances for the 16S gene, below the distances for the COI gene; white bars: intraspecific distances, black bars: interspecific distances.
